# Supplementary material
Source: publisher site journal article supplement (https://www.dovepress.com/article/453709)
Supplement: Supplementary file 1 [file get_supplementary_file.php]

Supporting Information

**Nanoparticle/Engineered Bacteria based Triple-strategy Delivery System for Enhanced Hepatocellular Carcinoma Cancer Therapy**

Meiyang Yang1,2*, Weijun Chen1*, Dhanu Gupta3, Congjin Mei1, Yang Yang1, Bingke Zhao1, Lipeng Qiu1#, and Jinghua Chen1#

1 School of Life Sciences and Health Engineering, Jiangnan University, Wuxi, People’s Republic of China

2 School of Chemical and Material Engineering, Jiangnan University, Wuxi, People’s Republic of China

3 Department of Paediatrics, University of Oxford, Oxford, UK

*These authors contributed equally to this work

#Correspondence: Lipeng Qiu; Jinghua Chen, School of Life Sciences and Health Engineering, Jiangnan University, Wuxi 214122, People’s Republic of China, Email qiulp@jiangnan.edu.cn; chenjinghua@jiangnan.edu.cn


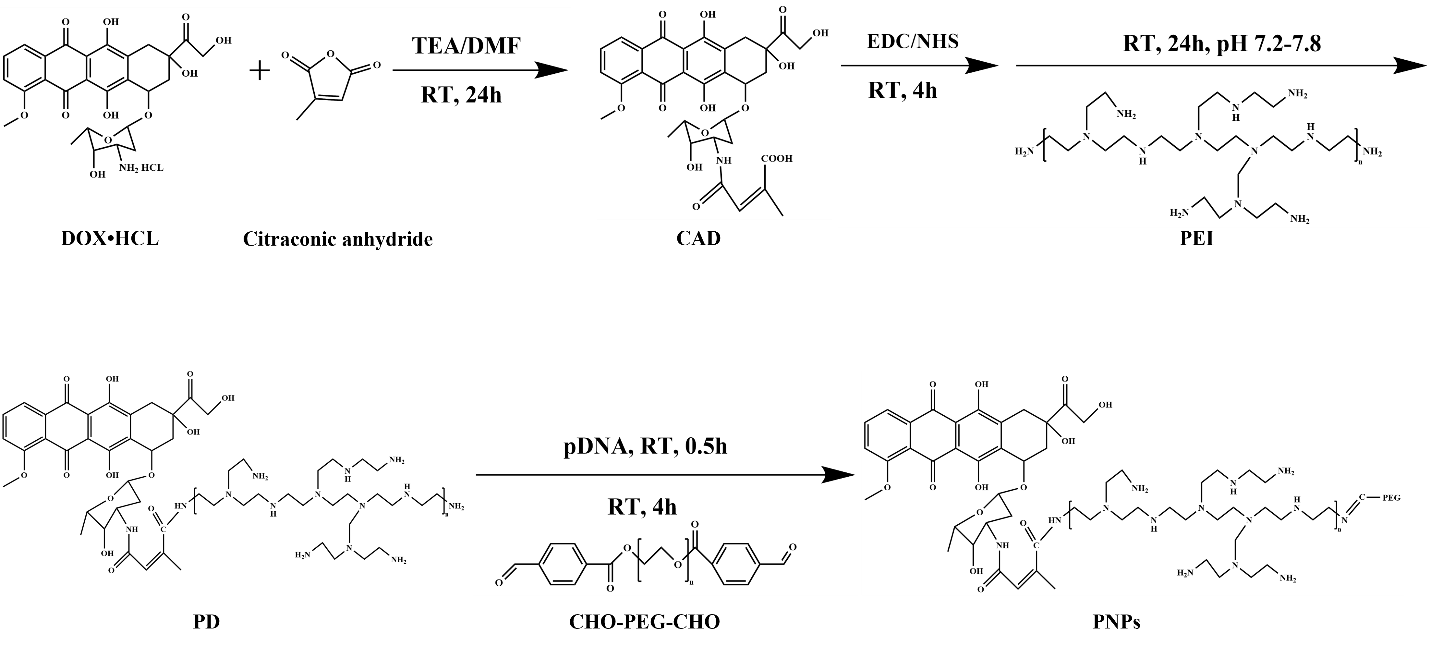


**Figure S1** Synthesis of PNPs.


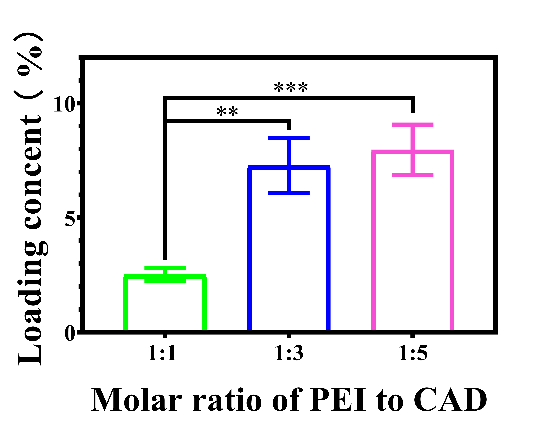


**Figure S2** Loading concent of PEI and CAD at different molar ratio (∗∗P < 0.01, ∗∗∗P < 0.001).


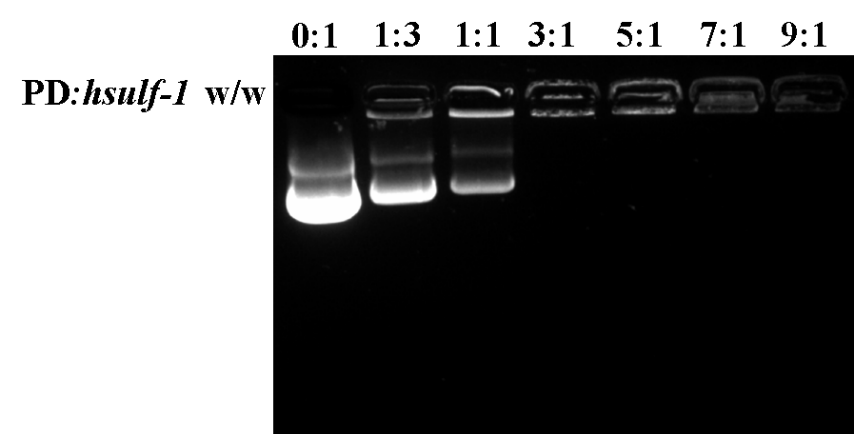


**Figure S3** Gel electrophoresis of PD and hsulf-1 at different w/w.


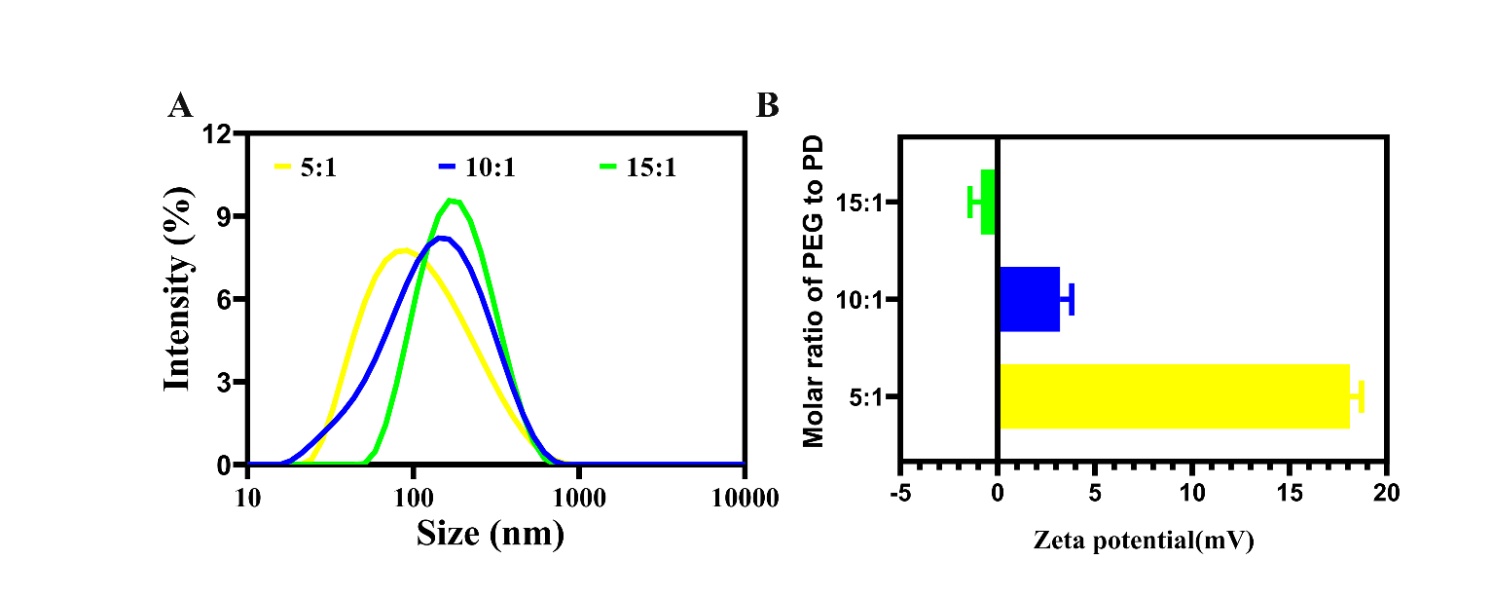


**Figure S4** Hydrodynamic diameter (A) and zeta potential (B) of CHO-PEG-CHO and PD at different molar ratio.





**Figure S5** Infrared spectrum of DOX, CAD, PEI, PD, CHO-PEG-CHO and PNPs.


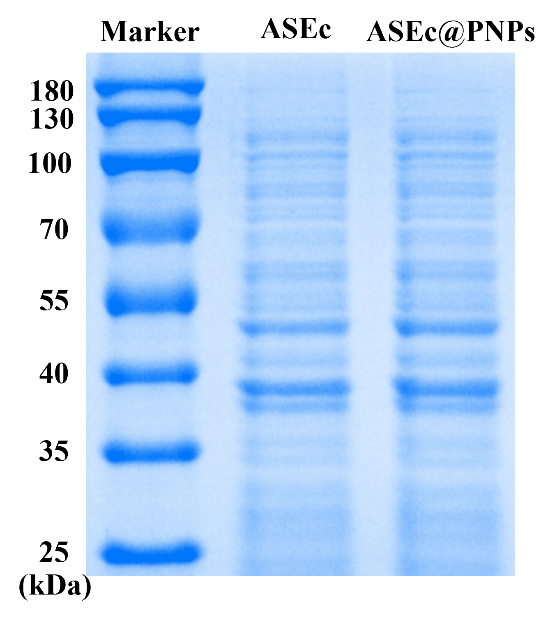


**Figure S6** SDS-PAGE protein patterns of ASEc and ASEc@PNPs.


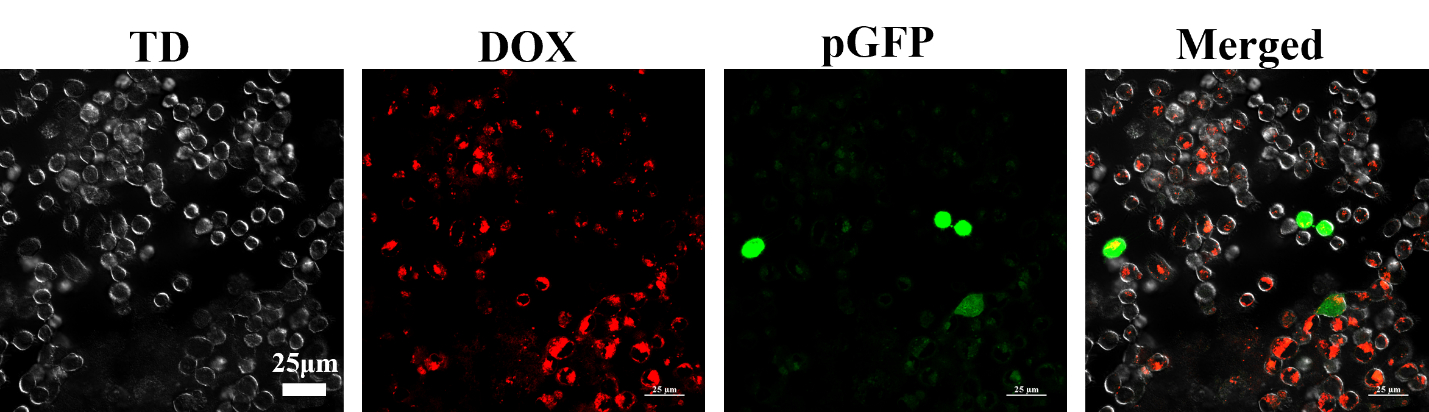


**Figure S7** Cellular uptake and transfection of PNPs/pGFPcomplex nanoparticles in HepG2 cells incubated for 48 h, observed by confocal laser scanning microscopy. The green fluorescence was induced from pGFP, and the red fluorescence was from DOX itself. Scale bars: 25 μm.


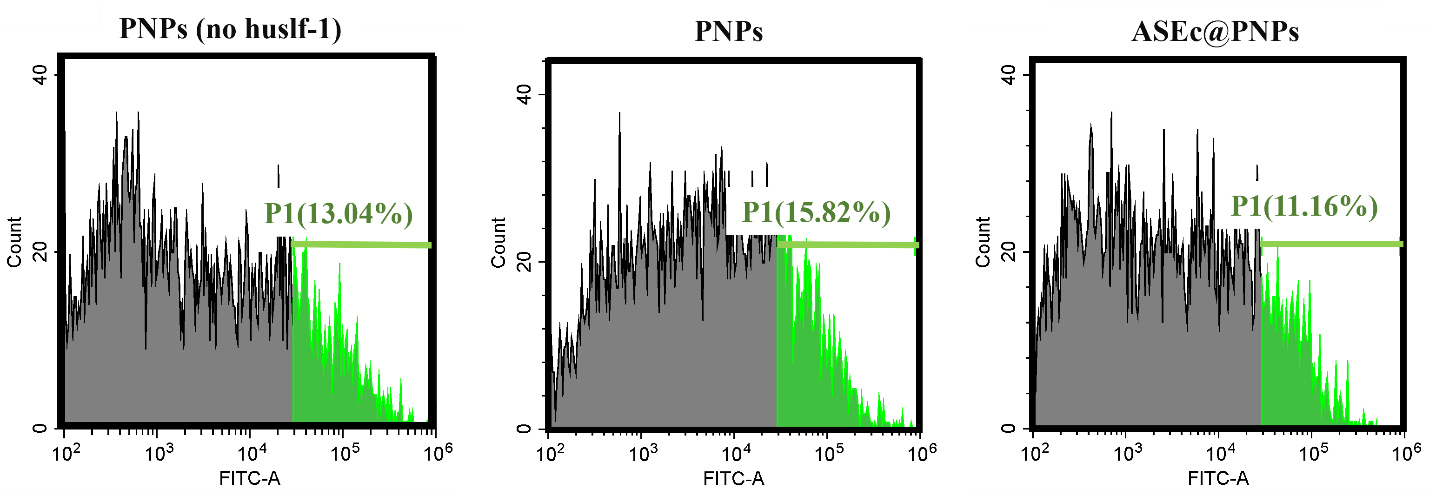


**Figure S8** Detection of CRT expression levels by flow cytometry.


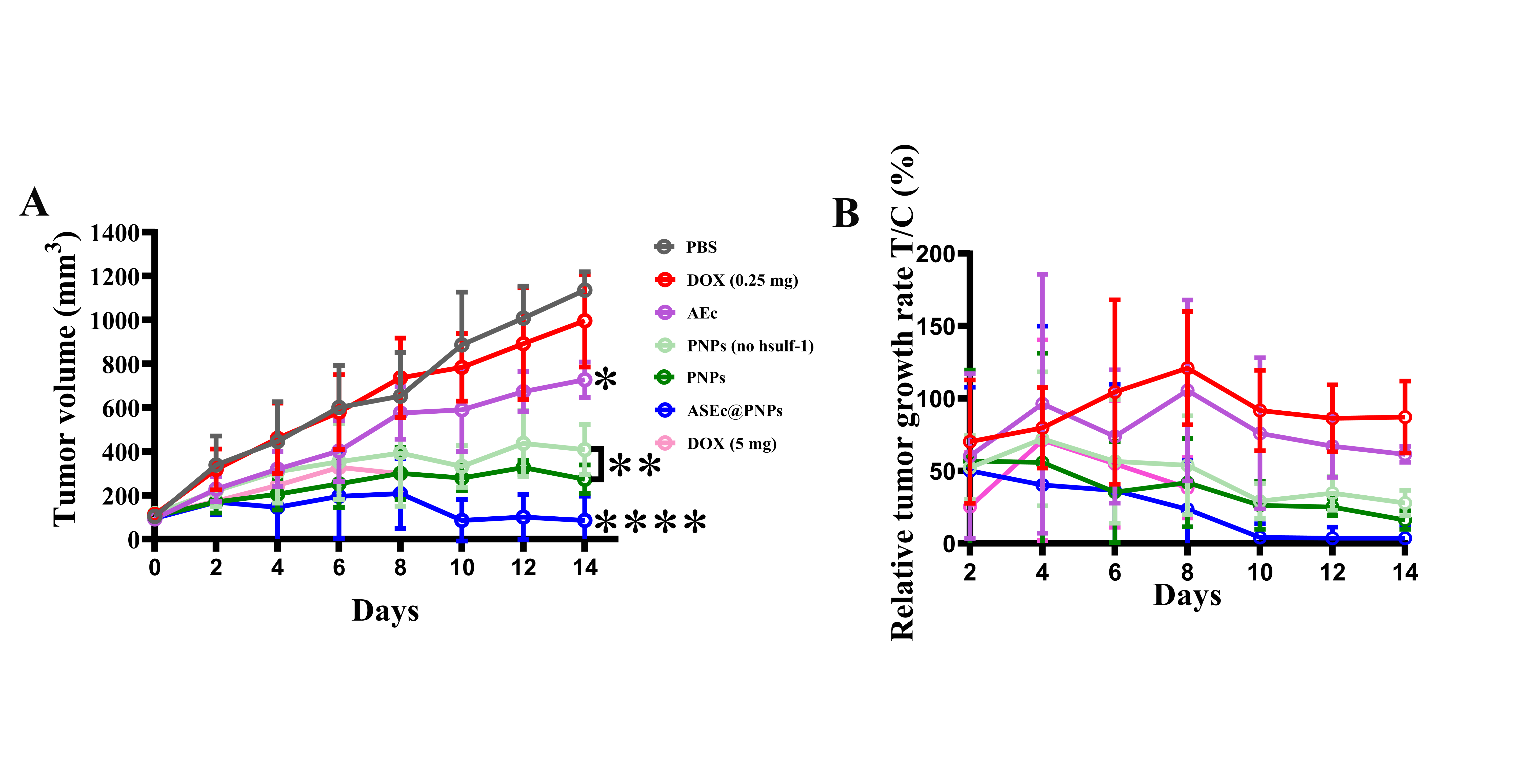


**Figure S9** Tumor volume (A) variation and relative tumor growth rate (%) (B) of mice in the following 14 days (∗P < 0.05, ∗∗P < 0.01, ∗∗∗∗ P < 0.0001).


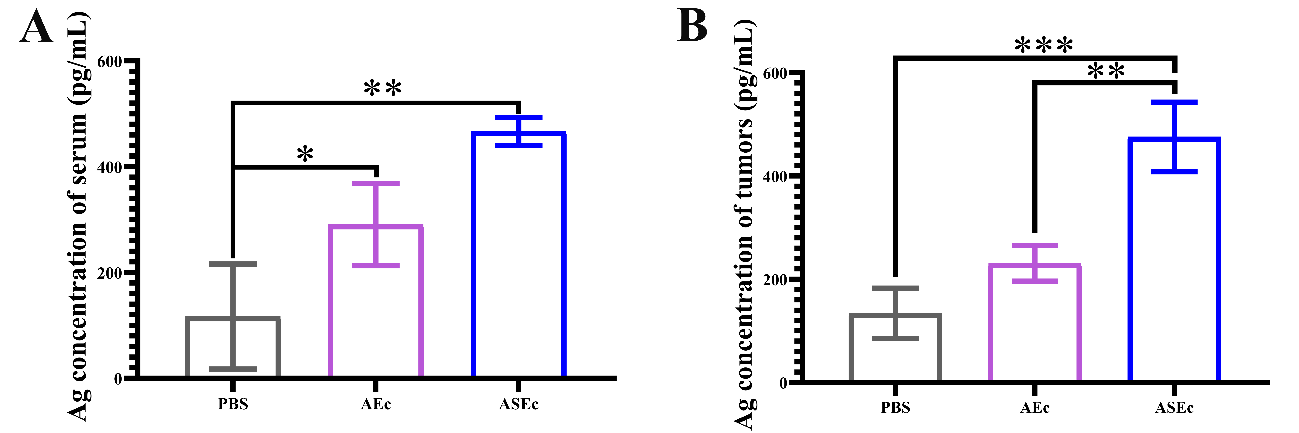


**Figure S10** The serum (A) and tumor tissues (B) Ag levels of mice at 14 days (∗P < 0.05, ∗∗P < 0.01, ∗∗∗ P < 0.001).


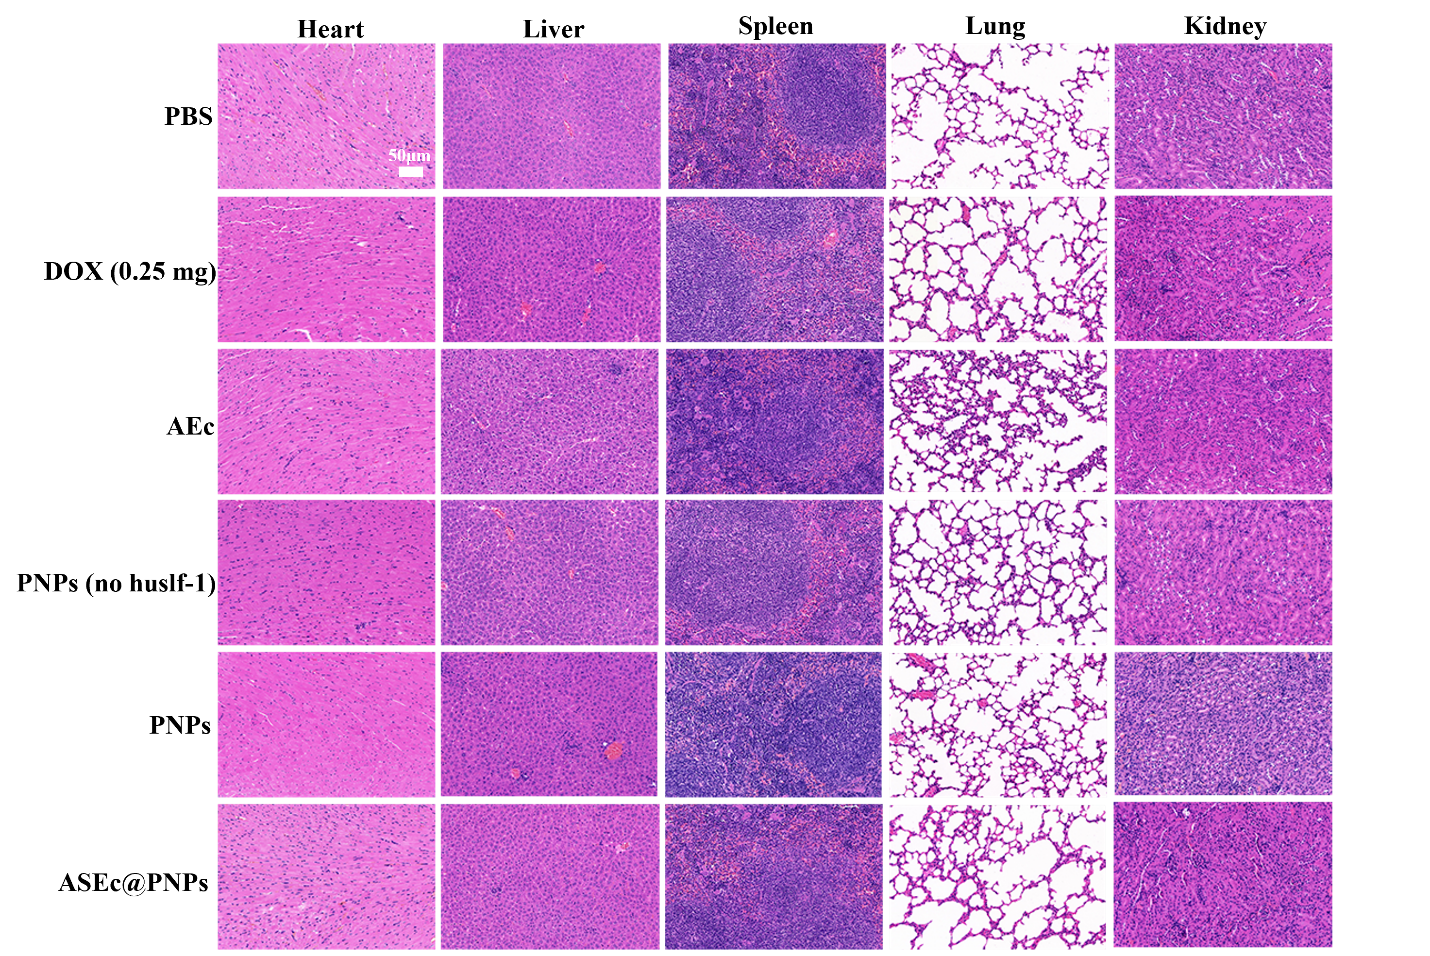


**Figure S11** H&E staining of mouse tissues 14 days after injection of PBS, DOX (0.25 mg), AEc, PNPs (no hsulf-1), PNPs or ASEc@PNPs. Scale bar: 50 μm.
